# Supplementary material for: Can Survival Prediction Be Improved By Merging Gene Expression Data Sets?
Source: PubMed Central journal article supplement (PMC2761544; doi:10.1371/journal.pone.0007431), 2009-10-23
Supplement: pone.0007431.s001.pdf [file pone.0007431.s001.pdf]

|         | GSE1456                               | GSE1992                               | GSE4335                              | Vijver                              | GSE3143                               | Merged-ComBat*                        |
|---------|---------------------------------------|---------------------------------------|--------------------------------------|-------------------------------------|---------------------------------------|---------------------------------------|
| GSE1456 | NA                                    | 2.01(0.95-4.26)<br>p=0.06             | 2.50(1.16-5.37)<br>p= <b>0.017</b>   | 6.55(2.5-17.19)<br>p= <b>1e-04</b>  | 3.33(1.47-7.53)<br>p= <b>0.003</b>    | 7.12(2.71-18.66)<br>p= <b>6.5e-05</b> |
| GSE1992 | 3.06(1.22-7.66)<br>p= <b>0.01</b>     | NA                                    | 3.44(1.49-7.96)<br>p= <b>0.0032</b>  | 4.82(1.81-12.81)<br>p= <b>0.001</b> | 5.08(1.9-13.57)<br>p= <b>0.001</b>    | 4.22(1.69-10.54)<br>p= <b>0.002</b>   |
| GSE4335 | 1.78(0.86-3.66)<br>p=0.11             | 1.59(0.7-3.62)<br>p=0.26              | NA                                   | 2.84(1.3-6.21)<br>p= <b>p=0.008</b> | 2.27(1.07-4.8)<br>p= <b>0.03</b>      | 2.53(1.19-5.35)<br>p= <b>0.015</b>    |
| Vijver  | 5.96(3.14-11.32)<br>p= <b>4.8e-08</b> | 3.99(2.37-6.74)<br>p= <b>2.02e-07</b> | 3.38(2.05-5.57)<br>p= <b>1.7e-06</b> | NA                                  | 3.43(2.07-5.68)<br>p= <b>1.83e-06</b> | 6.20(3.40-11.30)<br>p= <b>2.5e-09</b> |
| GSE3143 | p $\geq$ 0.05                         | p $\geq$ 0.05                         | p $\geq$ 0.05                        | 1.99(1.08-3.64)<br>p= <b>0.02</b>   | NA                                    | 2.13(1.17-3.87)<br>p= <b>0.012</b>    |

**Table S1: Cross-data set performance of breast cancer predictors trained on the individual and combined data sets (adjusted by ComBat) with respect to OS.** Significant HR ( $p < 0.05$ ) are shown in bold. The training sets are listed in the column header and the testing sets are indicated in the row header of the table. \* indicates that the predictor was trained from all data sets except the testing set. NA stands for Not Available.
