# Supplementary material for: Can Survival Prediction Be Improved By Merging Gene Expression Data Sets?
Source: PubMed Central journal article supplement (PMC2761544; doi:10.1371/journal.pone.0007431), 2009-10-23
Supplement: pone.0007431.s002.pdf [file pone.0007431.s002.pdf]

|         | GSE1456                               | GSE1992                              | GSE4335                              | Vijver                                | GSE3143                              | Merged-zscore*                        |
|---------|---------------------------------------|--------------------------------------|--------------------------------------|---------------------------------------|--------------------------------------|---------------------------------------|
| GSE1456 | NA                                    | 2.54(1.08-5.94)<br>p= <b>0.032</b>   | 2.63(1.22-5.65)<br>p= <b>0.014</b>   | 8.86(3.08-25.47)<br>p= <b>5.1e-05</b> | 2.61(1.19-5.74)<br>p= <b>0.017</b>   | 4.74(2.02-11.12)<br>p= <b>0.00033</b> |
| GSE1992 | p $\geq$ 0.05                         | NA                                   | 3.67(1.59-8.51)<br>p= <b>0.0024</b>  | 4.34(1.74-10.82)<br>p= <b>0.0017</b>  | 3.31(1.32-8.29)<br>p= <b>0.011</b>   | 4.28(1.71-10.69)<br>p= <b>0.0018</b>  |
| GSE4335 | 1.87(0.82-4.25)<br>p=0.14             | 3.73(1.15-12.14)<br>p= <b>0.029</b>  | NA                                   | 2.72(1.37-5.40)<br>p= <b>0.0043</b>   | 3.30(1.45-7.49)<br>p= <b>0.0044</b>  | 2.90(1.43-5.85)<br>p= <b>0.003</b>    |
| Vijver  | 5.91(3.04-11.52)<br>p= <b>1.8e-07</b> | 3.32(1.89-5.86)<br>p= <b>3.3e-05</b> | 3.36(2.04-5.54)<br>p= <b>1.9e-06</b> | NA                                    | 3.61(2.10-6.21)<br>p= <b>3.4e-06</b> | 5.21(2.90-9.33)<br>p= <b>2.8e-08</b>  |
| GSE3143 | p $\geq$ 0.05                         | p $\geq$ 0.05                        | p $\geq$ 0.05                        | 2.10(1.16-3.82)<br>p= <b>0.014</b>    | NA                                   | 1.93(1.06-3.49)<br>p= <b>0.03</b>     |

**Table S2: Cross-data set performance of breast cancer predictors trained on the individual and combined data sets (normalized by Z-score normalization) with respect to OS.** Significant HR ( $p < 0.05$ ) are shown in bold. The training sets are listed in the column header and the testing sets are indicated in the row header of the table. Merged-zscore refers to the merged data set combined from the individual data sets, each normalized separately by Z-score normalization. \* indicates that the predictor was trained from all data sets except the testing set. NA stands for Not Available.
