# Supplementary material for: Can Survival Prediction Be Improved By Merging Gene Expression Data Sets?
Source: PubMed Central journal article supplement (PMC2761544; doi:10.1371/journal.pone.0007431), 2009-10-23
Supplement: pone.0007431.s003.pdf [file pone.0007431.s003.pdf]

|         | GSE1456     | GSE1992     | GSE4335     | Vijver      | GSE2990     | GSE4922     | GSE2034     | Merged-ComBat* |
|---------|-------------|-------------|-------------|-------------|-------------|-------------|-------------|----------------|
| GSE1456 | NA          | <b>0.69</b> | <b>0.67</b> | <b>0.76</b> | <b>0.77</b> | <b>0.72</b> | <b>0.72</b> | <b>0.73</b>    |
| GSE1992 | 0.56        | NA          | <b>0.67</b> | <b>0.69</b> | <b>0.72</b> | <b>0.60</b> | 0.56        | <b>0.71</b>    |
| GSE4335 | <b>0.60</b> | <b>0.65</b> | NA          | <b>0.68</b> | <b>0.61</b> | 0.59        | <b>0.65</b> | <b>0.64</b>    |
| Vijver  | <b>0.67</b> | <b>0.65</b> | <b>0.65</b> | NA          | <b>0.63</b> | <b>0.64</b> | <b>0.66</b> | <b>0.67</b>    |
| GSE2990 | 0.59        | <b>0.67</b> | <b>0.61</b> | 0.57        | NA          | 0.53        | 0.59        | <b>0.60</b>    |
| GSE4922 | <b>0.65</b> | 0.57        | 0.56        | <b>0.64</b> | <b>0.61</b> | NA          | <b>0.64</b> | <b>0.64</b>    |
| GSE2034 | 0.57        | 0.59        | 0.53        | 0.58        | <b>0.60</b> | 0.56        | NA          | 0.58           |

**Table S3: Cross-data set performance of breast cancer predictors trained on the individual and combined data sets (adjusted by ComBat) with respect to RFS.** Significant AUC ( $> 0.60$ ) are shown in bold. The training sets are listed in the column header and the testing sets are indicated in the row header of the table. \* indicates that the predictor was trained from all data sets except the testing set. NA stands for Not Available.
