# Supplementary material for: Can Survival Prediction Be Improved By Merging Gene Expression Data Sets?
Source: PubMed Central journal article supplement (PMC2761544; doi:10.1371/journal.pone.0007431), 2009-10-23
Supplement: pone.0007431.s005.pdf [file pone.0007431.s005.pdf]

|         | GSE1456                             | GSE1992                              | GSE4335                              | Vijver                                | GSE2034                              | GSE2990                               | GSE4922                             | Merged-ComBat*                        |
|---------|-------------------------------------|--------------------------------------|--------------------------------------|---------------------------------------|--------------------------------------|---------------------------------------|-------------------------------------|---------------------------------------|
| GSE1456 | NA                                  | 3.11(1.58-6.12)<br><b>p=0.001</b>    | 2.38(1.27-4.44)<br><b>p=0.0063</b>   | 7.82(3.28-18.67)<br><b>p=3.60e-06</b> | 3.73(1.89-7.34)<br><b>p=0.0001</b>   | 6.88(2.69-17.59)<br><b>p=5.56e-05</b> | 4.60(2.11-9.99)<br><b>p=0.0001</b>  | 6.19(2.85-13.45)<br><b>p=4.22e-06</b> |
| GSE1992 | 2.30(1.12-4.71)<br><b>p=0.022</b>   | NA                                   | 2.63(1.31-5.25)<br><b>p=0.0061</b>   | 2.58(1.24-5.39)<br><b>p=0.011</b>     | 3.02(1.47-6.19)<br><b>p=0.0025</b>   | 2.82(1.23-6.47)<br><b>p=0.014</b>     | 2.20(1.05-4.59)<br><b>p=0.035</b>   | 2.90(1.41-5.94)<br><b>p=0.0035</b>    |
| GSE4335 | $p \geq 0.05$                       | $p \geq 0.05$                        | NA                                   | $p \geq 0.05$                         | $p \geq 0.05$                        | $p \geq 0.05$                         | $p \geq 0.05$                       | $p \geq 0.05$                         |
| Vijver  | 3.94(2.5-6.21)<br><b>p=3.45e-09</b> | 2.94(1.95-4.42)<br><b>p=2.65e-07</b> | 2.22(1.51-3.28)<br><b>p=5.60e-05</b> | NA                                    | 2.68(1.79-4.01)<br><b>p=1.83e-06</b> | 3.6(2.27-5.72)<br><b>p=5.45e-08</b>   | 2.48(1.66-3.7)<br><b>p=9.40e-06</b> | 3.08(2.05-4.61)<br><b>p=5.25e-08</b>  |
| GSE2034 | 1.83(1.23-2.74)<br><b>p=0.0027</b>  | 1.86(1.26-2.73)<br><b>p=0.0015</b>   | $p \geq 0.05$                        | 1.80(1.22-2.65)<br><b>p=0.003</b>     | NA                                   | 1.80(1.22-2.65)<br><b>p=0.0029</b>    | 1.85(1.23-2.77)<br><b>p=0.0037</b>  | 1.83(1.24-2.69)<br><b>p=0.002</b>     |
| GSE2990 | $p \geq 0.05$                       | $p \geq 0.05$                        | $p \geq 0.05$                        | $p \geq 0.05$                         | $p \geq 0.05$                        | NA                                    | $p \geq 0.05$                       | $p \geq 0.05$                         |
| GSE4922 | 2.50(1.60-3.89)<br><b>p=4.7e-05</b> | $p \geq 0.05$                        | 1.72(1.13-2.61)<br><b>p=0.011</b>    | 2.15(1.41-3.27)<br><b>p=0.0003</b>    | 1.99(1.31-3.04)<br><b>p=0.0013</b>   | 2.54(1.62-3.96)<br><b>p=4.3e-05</b>   | NA                                  | 2.36(1.55-3.61)<br><b>p=7.1e-05</b>   |

**Table S5: HR of breast cancer predictors trained on the individual and combined data sets (adjusted by ComBat) with respect to RFS.** Significant HR ( $p < 0.05$ ) are shown in bold. The training sets are listed in the column header and the testing sets are indicated in the row header of the table. \* indicates that the predictor was trained from all data sets except the testing set. NA stands for Not Available.
