# Supplementary material for: Can Survival Prediction Be Improved By Merging Gene Expression Data Sets?
Source: PubMed Central journal article supplement (PMC2761544; doi:10.1371/journal.pone.0007431), 2009-10-23
Supplement: pone.0007431.s006.pdf [file pone.0007431.s006.pdf]

|         | GSE1456                               | GSE1992                               | GSE4335                               | Vijver                                 | GSE2034                               | GSE2990                              | GSE4922                               | Merged-zscore*                       |
|---------|---------------------------------------|---------------------------------------|---------------------------------------|----------------------------------------|---------------------------------------|--------------------------------------|---------------------------------------|--------------------------------------|
| GSE1456 | NA                                    | 3.51(1.62-7.63)<br>p= <b>0.0015</b>   | 3.16(1.65-6.06)<br>p= <b>0.00053</b>  | 6.25(2.88-13.59)<br>p= <b>1.05e-05</b> | 2.90(1.50-5.63)<br>p= <b>0.0016</b>   | 6.18(2.73-14)<br>p= <b>1.2e-05</b>   | 5.25(2.32-11.89)<br>p= <b>7e-05</b>   | 6.51(2.87-14.75)<br>p= <b>7e-06</b>  |
| GSE1992 | p ≥ 0.05                              | NA                                    | 2.96(1.46-5.98)<br>p= <b>0.0026</b>   | 2.72(1.33-5.55)<br>p= <b>0.006</b>     | 2.06(1.04-4.07)<br>p= <b>0.037</b>    | 2.02(1.00-4.08)<br>p=0.05            | 2.35(1.13-4.90)<br>p= <b>0.022</b>    | 2.12(1.06-4.22)<br>p= <b>0.032</b>   |
| GSE4335 | p ≥ 0.05                              | 4.77(1.14-19.86)<br>p= <b>0.032</b>   | NA                                    | p ≥ 0.05                               | p ≥ 0.05                              | p ≥ 0.05                             | p ≥ 0.05                              | p ≥ 0.05                             |
| Vijver  | 3.37(2.17-5.21)<br>p= <b>5.05e-08</b> | 3.40(2.17-5.32)<br>p= <b>8.60e-08</b> | 2.37(1.60-3.49)<br>p= <b>1.42e-05</b> | NA                                     | 2.57(1.73-3.83)<br>p= <b>3.45e-06</b> | 3.19(2.08-4.88)<br>p= <b>1.0e-07</b> | 3.07(2.03-4.64)<br>p= <b>1.11e-07</b> | 3.18(2.10-4.82)<br>p= <b>4.3e-08</b> |
| GSE2034 | 1.83(1.23-2.72)<br>p= <b>0.0029</b>   | 1.80(1.22-2.66)<br>p= <b>0.0032</b>   | p ≥ 0.05                              | 1.95(1.32-2.87)<br>p= <b>0.0001</b>    | NA                                    | 1.77(1.20-2.62)<br>p= <b>0.0043</b>  | 1.60(1.08-2.35)<br>p= <b>0.018</b>    | 1.76(1.19-2.61)<br>p= <b>0.0041</b>  |
| GSE2990 | 3.22(1.39-7.45)<br>p= <b>0.0064</b>   | 2.54(1.22-5.28)<br>p= <b>0.012</b>    | p ≥ 0.05                              | 3.39(1.57-7.33)<br>p= <b>0.001</b>     | 3.14(1.48-6.68)<br>p= <b>0.003</b>    | NA                                   | 2.31(1.09-4.87)<br>p= <b>0.029</b>    | 3.79(1.70-8.46)<br>p= <b>0.0011</b>  |
| GSE4922 | 2.25(1.45-3.49)<br>p= <b>0.00028</b>  | p ≥ 0.05                              | 1.83(1.20-2.78)<br>p= <b>0.0049</b>   | 2.33(1.53-3.56)<br>p= <b>8.76e-05</b>  | 2.01(1.31-3.06)<br>p= <b>0.0012</b>   | 2.56(1.67-3.94)<br>p= <b>1.8e-05</b> | NA                                    | 2.25(1.47-3.43)<br>p= <b>0.00017</b> |

**Table S6: HR of breast cancer predictors trained on the individual and combined data sets (normalized by Z-score normalization) with respect to RFS.** Significant HR ( $p < 0.05$ ) are shown in bold. The training sets are listed in the column header and the testing sets are indicated in the row header of the table. Merged-zscore refers to the data set merged from the individual data set, each normalized separately by Z-score normalization.\* indicates that the predictor was trained from all data sets except the testing set. NA stands for Not Available.
